# Supplementary material for: PhosphoTyrosyl Phosphatase Activator of Plasmodium falciparum: Identification of Its Residues Involved in Binding to and Activation of PP2A
Source: MDPI journal article supplement (doi:10.3390/ijms15022431), 2014-02-11

# Supplementary Information

**Table S1.** List of primers used throughout this study.

| N° primer | Sequence                                | Orientation | Restriction site | Vector    | Tagged gene | Use                              |
|-----------|-----------------------------------------|-------------|------------------|-----------|-------------|----------------------------------|
| PTPA      |                                         |             |                  |           |             |                                  |
| p1        | GGATCCGGGTGATGTAAATAGCTTGAGTTA          | F           | BamHI            | pETDuet 1 | 6-His       | PfPTPA recombinant protein       |
| p2        | GTCGACTTAAAAGTCTATCAAATTTCCAAATAATATGTG | R           | Sall             | pETDuet 1 | 6-His       | PfPTPA recombinant protein       |
|           |                                         |             |                  |           |             |                                  |
| p3        | CTCGAGATGGGTGATGTAATAGCTTGAG            | F           | XhoI             | pARL      | GFP         | PfPTPA-GFP episomal construct    |
| p4        | GGTACCAAAGTCTATCAAATTTCCAAATAATATGTGTTG | R           | KpnI             | pARL      | GFP         | PfPTPA-GFP episomal construct    |
| p5        | CTGCAGATGGGTGATGTAATAGCTTGAG            | F           | PstI             | pCAM BSD  |             | KO construct                     |
| p6        | GGATCCCATTAATAATAGTGTATATACAC           | R           | BamHI            | pCAM BSD  |             | KO construct                     |
| p9        | GAAAATAATATTAATGTGCTTCC                 | F           |                  |           |             | Genotype of transfected parasite |
| p10       | GTAATTTATGGGATAGCGATTTTTTTTACTGTCTG     | F           |                  |           |             | Detection of episomes            |
| p11       | CCAAGCGCGCAATTAACCCTCACTAAAG            | R           |                  |           |             | Detection of episomes            |
| p12       | GATCTAGCATAATCTGGAACATCATATGGATAG       | R           |                  |           |             | Genotype of transfected parasite |
|           |                                         |             |                  |           |             |                                  |
| p13       | GCACCTTTTCATGCATCATCCCAAATG             | F           |                  | pETDuet 1 | 6-His       | mutagenesis PfPTPA E272A         |
| p14       | CATTTGGGATGATGCATGAAAAGGTGC             | R           |                  | pETDuet 1 | 6-His       | mutagenesis PfPTPA E272A         |
| p15       | GATATATCTGGAGCTGAAACATGGGAA             | F           |                  | pETDuet 1 | 6-His       | mutagenesis PfPTPA V283A         |
| p16       | TTCCCATGTTTCAGCTCCAGATATATC             | R           |                  | pETDuet 1 | 6-His       | mutagenesis PfPTPA V283A         |
| p17       | GAAAAAATATGTAATGCATTACTTAAAATGTAT       | F           |                  | pETDuet 1 | 6-His       | mutagenesis PfPTPA G292A         |
| p18       | ATACATTTTAAGTAATGCATTACATATTTTTTC       | R           |                  | pETDuet 1 | 6-His       | mutagenesis PfPTPA G292A         |
| p19       | TGGATTACTTAAAGCGTATCAAGCTGAAA           | F           |                  | pETDuet 1 | 6-His       | mutagenesis PfPTPA M296A         |
| p20       | TTTCAGCTTGATACGCTTTAAGTAATCCA           | R           |                  | pETDuet 1 | 6-His       | mutagenesis PfPTPA M296A         |
| p21       | TGAAATAATACAAGCGCGACAAATATTAC           | F           |                  | pETDuet 1 | 6-His       | mutagenesis PfPTPA K304A         |
| p22       | GTAATATTGTCTCGCTTGTATTATTCA             | R           |                  | pETDuet 1 | 6-His       | mutagenesis PfPTPA K304A         |
| PP2A      |                                         |             |                  |           |             |                                  |
| p23       | GGATCCGGCAAAAGGAGAAGAAAGAAAGTG          | F           | BamHI            | pETDuet 1 | 6-His       | PfPP2A recombinant protein       |
| p24       | GTCGACTTATAAGAAGTAGGGTATGGTGGC          | R           | Sall             | pETDuet 1 | 6-His       | PfPP2A recombinant protein       |
| p25       | CTCGAGATGGCAAAAGGAGAAGAAAGAAAG          | F           | XhoI             | pARL      | GFP         | PfPP2A-GFP episomal construct    |
| p26       | GGTACCTAAGAAGTAGGGTATGGTGGCC            | R           | KpnI             | pARL      | GFP         | PfPP2A-GFP episomal construct    |
| p27       | CTGCAGATGGCAAAAGGAGAAGAAAGAAAG          | F           | PstI             | pCAM BSD  |             | KO construct                     |
| p28       | GGATCCCGATAACAATAATTAGGAGCTG            | R           | BamHI            | pCAM BSD  |             | KO construct                     |
| p31       | AAAATATTCGGCTTTTATATCATTTGG             | F           |                  |           |             | Genotype of transfected parasite |

**Table S2.** List of proteins used in phylogenetic analysis. For *Plasmodium* proteins, accession numbers are from PlasmoDB Database.

| Species                               | PTPA orthologs   | Inhibitor 2 PP2A orthologs | Inhibitor 2 PP1 orthologs | Inhibitor 3 PP1 orthologs |
|---------------------------------------|------------------|----------------------------|---------------------------|---------------------------|
|                                       | Accession number | Accession number           | Accession number          | Accession number          |
| <i>Arabidopsis thaliana</i>           | AEE82701.1       | AAF27100.1                 | AED96182.1                | NP_565720 INH3            |
| <i>Caenorhabditis elegans</i>         | CCD73872.1       | NP_001021332.1             | NP_498147.1               | WBGene00015579            |
| <i>Danio rerio</i>                    | NP_001003425.2   | AAQ97849.1                 | NP_991231.1               | ENSDARP00000052351        |
| <i>Drosophila melanogaster</i>        | AAF51115.1       | AAF55155.1                 | NP_524013.1               | FBpp0078819               |
| <i>Homo sapiens</i>                   | CAA60163.1       | CAG46847.1                 | NP_006232.1               | ENSP00000407981           |
| <i>Leishmania major</i>               | XP_001680923.1   | XP_001685161.1             | XP_003722091.1            | LmjF.07.0743              |
| <i>Mus musculus</i>                   | AAK62028.1       | NP_076360.1                | NP_080076.1               | ENSMUSP00000047202        |
| <i>Oryza sativa</i>                   | BAD37240.1       | ABR26120.1                 | NP_001055135.1            | NP_001052397              |
| <i>Plasmodium berghei</i>             | PBANKA_101460    | PBANKA_081990              | PBANKA_121850             | PBANKA_051550             |
| <i>Plasmodium chabaudi</i>            | PCHAS_101540     | PCHAS_082020               | PCHAS_121920              | PCHAS_051560              |
| <i>Plasmodium falciparum</i>          | PF3D7_1430100    | PF3D7_0919000              | PFIT_0320000              | PFIT_1031100              |
| <i>Plasmodium knowlesi</i>            | PKH_132020       | PKH_071620                 | PKH_082100                | PCYB_062600               |
| <i>Plasmodium vivax</i>               | PVX_085035       | PVX_099365                 | PVX_095235                | PVX_111140                |
| <i>Plasmodium yoelii yoelii</i>       | PYYM_1016100     | PYYM_0822900               | PY06380                   | PYYM_0516000              |
| <i>Schistosoma mansoni</i>            | XP_002579273.1   | CCD59858.1                 | Smp_046160.1              | Smp_097560                |
| <i>Tetrahymena thermophila</i>        | XP_001010763.2   | XP_001022132.2             | XP_001024018.2            | XP_001014401.1            |
| <i>Theileria parva</i>                | EAN33933.1       | XP_763467.1                | XP_764857.1               | XP_764385.1               |
| <i>Toxoplasma gondii</i>              | XP_002369121.1   | XP_002368303.1             | XP_002368145.1            | TGME49_226825             |
| <i>Trypanosoma brucei</i>             | AEEX79776.1      | XP_827991.1                | CBH10274.1                | Tb927.8.1040              |
| <i>Xenopus laevis (or tropicalis)</i> | NP_001089500.1   | NP_001079909.1             | NP_001091136.1            | NP_001004815.1            |

**Figure S1.** Nucleotide and deduced amino acid sequences of PfPTPA cDNA. Nucleotides are numbered to the right of the sequence and amino acids are numbered under the sequence.

|    |                                                                                                                                         |     |
|----|-----------------------------------------------------------------------------------------------------------------------------------------|-----|
| 5' | ATGGGTGATGTAATAGCTTGAGTTATAAAATAATTAAACGATGAAAGTATTATAAGATTACGAAAAGTTCTATATATAATGATATAATTGAATTTATTA                                     | 100 |
| °  | M G D V N S L S Y K I I N D E S I I R F T K S S I Y N D I I E F I                                                                       |     |
|    | 1 2 3 4 5 6 7 8 9 10 11 12 13 14 15 16 17 18 19 20 21 22 23 24 25 26 27 28 29 30 31 32 33                                               |     |
| 5' | CGAATTTAAATAAATCAGTTGTCGGTGTGAAATGAAACCTTTAGAAGATTTTAAATTATGTAATGAAATGATATGATTAATAATGACAATTTTATT                                        | 200 |
| °  | T N L N K S V V G V E M K P L E D F K L C N E N D M I N N D N F L F                                                                     |     |
|    | 34 35 36 37 38 39 40 41 42 43 44 45 46 47 48 49 50 51 52 53 54 55 56 57 58 59 60 61 62 63 64 65 66 67                                   |     |
| 5' | CTTATCAAAAAATGTATATAATATTTTCAATTGATAAAAAATATGAACAAGTGTATTGATTCTTGTCACCTATAAAATCAATCATCTCGATTGGTAAT                                      | 300 |
| °  | L S K N V Y N I F Q L I K N M N K C I D S C P P I N Q S S R F G N                                                                       |     |
|    | 68 69 70 71 72 73 74 75 76 77 78 79 80 81 82 83 84 85 86 87 88 89 90 91 92 93 94 95 96 97 98 99 100                                     |     |
| 5' | AGAGGATTTCAACATTTTGTGATGCATATTATAAGAAGTTGATGAGTATTTACCTCATGCTTTATCAGAATCAAACATACCTAATATATCTGAACATA                                      | 400 |
| °  | R G F Q H F C D A Y Y K E V D E Y L P H A L S E S N I P N I S E H                                                                       |     |
|    | 101 102 103 104 105 106 107 108 109 110 111 112 113 114 115 116 117 118 119 120 121 122 123 124 125 126 127 128 129 130 131 132 133     |     |
| 5' | CTTATCAAATATCTTATTATTTAAAGAATTCATTGGAATAAAAAGAGAATAGATTATGGAACCTGGGCATGAATTAATTTTTTGCTTTTCCTCTTTTG                                      | 500 |
| °  | T Y Q I S Y Y L K N S I G N K K R I D Y G T G H E L N F L L F L F C                                                                     |     |
|    | 134 135 136 137 138 139 140 141 142 143 144 145 146 147 148 149 150 151 152 153 154 155 156 157 158 159 160 161 162 163 164 165 166 167 |     |
| 5' | CCTAAATAAAATAAATTTCTTTATTCCTTCGGATTACAAGCACCTCGTCTGTTTTATATCGACAGTATTTAGAAGGAGTAAGAAGAGTGCAGATAATT                                      | 600 |
| °  | L N K I N F F I P S D Y K H L V L V L Y R Q Y L E G V R R V Q I I                                                                       |     |
|    | 168 169 170 171 172 173 174 175 176 177 178 179 180 181 182 183 184 185 186 187 188 189 190 191 192 193 194 195 196 197 198 199 200     |     |
| 5' | TACTGTGGAACCTGCAGGTAGTAGAGGGGCATGGGGATTGGATGATTTTCAATTTCTGTTTTCTTTTGGCGCAGCTCAACTTTCTTACAACAGGA                                         | 700 |
| °  | Y T V E P A G S R G A W G L D D F Q F L V F L F G A A Q L S Y N R                                                                       |     |
|    | 201 202 203 204 205 206 207 208 209 210 211 212 213 214 215 216 217 218 219 220 221 222 223 224 225 226 227 228 229 230 231 232 233     |     |
| 5' | AAATAAAACCGACGATATTGAAAAAAGAATTGTTGGAATTGTGGGCACCGAAATATTTATATTTTGATGCTCTTAAGTATATATCAATGATAAAACA                                       | 800 |
| °  | K I K T D D I E K K E L L E L W A P K Y L Y F D A L K Y I S M I K H                                                                     |     |
|    | 234 235 236 237 238 239 240 241 242 243 244 245 246 247 248 249 250 251 252 253 254 255 256 257 258 259 260 261 262 263 264 265 266 267 |     |
| 5' | TGCACCTTTTCATGAATCATCCCAATGTTGTATGATATATCTGGAGTTGAAACATGGGAAAAAATATGTAATGGATTACTTAAATGTATCAAGCTGAA                                      | 900 |
| °  | A P F H E S S Q M L Y D I S G V E T W E K I C N G L L K M Y Q A E                                                                       |     |
|    | 268 269 270 271 272 273 274 275 276 277 278 279 280 281 282 283 284 285 286 287 288 289 290 291 292 293 294 295 296 297 298 299 300     |     |
| 5' | ATAATACAAAAGCGACAAATATTACAACACATATTATTTGGAATTTGATAGACTTTTAA                                                                             |     |
| °  | I I Q K R Q I L Q H I L F G N L I D F .                                                                                                 |     |
|    | 301 302 303 304 305 306 307 308 309 310 311 312 313 314 315 316 317 318 319 320                                                         |     |

Figure S3. Optimized sequence of PfPTPA 5mut.

|    |     |     |     |     |     |     |     |     |     |     |     |     |     |     |     |     |     |     |     |     |     |     |     |
|----|-----|-----|-----|-----|-----|-----|-----|-----|-----|-----|-----|-----|-----|-----|-----|-----|-----|-----|-----|-----|-----|-----|-----|
| 5' | ATG | GGC | GAC | GTG | AAC | TCC | CTG | AGC | TAC | AAA | ATC | ATC | AAC | GAC | GAA | TCA | ATC | ATC | CGC | TTT | ACC | AAA | 66  |
| 1  | M   | G   | D   | V   | N   | S   | L   | S   | Y   | K   | I   | I   | N   | D   | E   | S   | I   | I   | R   | F   | T   | K   |     |
| 5' | TCG | AGC | ATC | TAC | AAC | GAC | ATT | ATC | GAA | TTT | ATT | ACC | AAC | CTG | AAT | AAA | AGC | GTG | GTT | GGT | GTC | GAA | 132 |
| 1  | S   | S   | I   | Y   | N   | D   | I   | I   | E   | F   | I   | T   | N   | L   | N   | K   | S   | V   | V   | G   | V   | E   |     |
| 5' | ATG | AAA | CCG | CTG | GAA | GAT | TTC | AAG | CTG | TGC | AAC | GAA | AAC | GAT | ATG | ATC | AAC | AAC | GAC | AAC | TTT | CTG | 198 |
| 1  | M   | K   | P   | L   | E   | D   | F   | K   | L   | C   | N   | E   | N   | D   | M   | I   | N   | N   | D   | N   | F   | L   |     |
| 5' | TTC | CTG | TCA | AAG | AAC | GTT | TAC | AAC | ATC | TTC | CAG | CTG | ATC | AAG | AAC | ATG | AAC | AAG | TGC | ATC | GAT | TCG | 264 |
| 1  | F   | L   | S   | K   | N   | V   | Y   | N   | I   | F   | Q   | L   | I   | K   | N   | M   | N   | K   | C   | I   | D   | S   |     |
| 5' | TGT | CCG | CCG | ATC | AAC | CAG | AGC | TCT | CGT | TTT | GGC | AAT | CGC | ATG | GGT | TTT | CAA | CAT | TTC | TGT | GAT | GCG | 330 |
| 1  | C   | P   | P   | I   | N   | Q   | S   | S   | R   | F   | G   | N   | R   | M   | G   | F   | Q   | H   | F   | C   | D   | A   |     |
| 5' | TAT | TAC | AAA | GAA | GTG | GAC | GAA | TAT | CTG | CCG | CAT | GCC | CTG | TCA | GAA | TCG | AAC | ATT | CCG | AAT | ATC | TCA | 396 |
| 1  | Y   | Y   | K   | E   | V   | D   | E   | Y   | L   | P   | H   | A   | L   | S   | E   | S   | N   | I   | P   | N   | I   | S   |     |
| 5' | GAA | CAC | ACC | TAC | CAG | ATT | AGC | TAC | TAC | CTG | AAG | AAC | TCT | ATC | GGC | AAC | AAA | AAG | CGT | ATC | GAT | TAT | 462 |
| 1  | E   | H   | T   | Y   | Q   | I   | S   | Y   | Y   | L   | K   | N   | S   | I   | G   | N   | K   | K   | R   | I   | D   | Y   |     |
| 5' | GGC | ACG | GGT | CAT | GAA | CTG | AAT | TTT | CTG | CTG | TTT | CTG | TTC | TGC | CTG | AAC | AAA | ATT | AAC | TTT | TTC | ATC | 528 |
| 1  | G   | T   | G   | H   | E   | L   | N   | F   | L   | L   | F   | L   | F   | C   | L   | N   | K   | I   | N   | F   | F   | I   |     |
| 5' | CCG | TCC | GAC | TAC | AAG | CAC | CTG | GTC | CTG | GTG | CTG | TAT | CGT | CAG | TAC | CTG | GAA | GGT | GTT | CGT | CGC | GTC | 594 |
| 1  | P   | S   | D   | Y   | K   | H   | L   | V   | L   | V   | L   | Y   | R   | Q   | Y   | L   | E   | G   | V   | R   | R   | V   |     |
| 5' | CAA | ATT | ATC | TAT | ACC | GTG | GAA | CCG | GCA | GGC | AGC | CGC | GGT | GCT | TGG | GGC | CTG | GAT | GAC | TTT | CAG | TTC | 660 |
| 1  | Q   | I   | I   | Y   | T   | V   | E   | P   | A   | G   | S   | R   | G   | A   | W   | G   | L   | D   | D   | F   | Q   | F   |     |
| 5' | CTG | GTT | TTT | CTG | TTC | GGC | GCG | GCC | CAA | CTG | TCT | TAC | AAC | CGC | AAA | ATT | AAG | ACG | GAT | GAC | ATC | GAA | 726 |
| 1  | L   | V   | F   | L   | F   | G   | A   | A   | Q   | L   | S   | Y   | N   | R   | K   | I   | K   | T   | D   | D   | I   | E   |     |
| 5' | AAG | AAA | GAA | CTG | CTG | GAA | CTG | TGG | GCG | CCG | AAA | TAT | CTG | TAC | TTT | GAT | GCC | CTG | AAA | TAT | ATT | AGT | 792 |
| 1  | K   | K   | E   | L   | L   | E   | L   | W   | A   | P   | K   | Y   | L   | Y   | F   | D   | A   | L   | K   | Y   | I   | S   |     |
| 5' | ATG | ATC | AAG | CAT | GCG | CCG | TTC | CAC | GCC | AGT | TCC | CAG | ATG | CTG | TAC | GAC | ATT | TCC | GGT | GCA | GAA | ACG | 858 |
| 1  | M   | I   | K   | H   | A   | P   | F   | H   | A   | S   | S   | Q   | M   | L   | Y   | D   | I   | S   | G   | A   | E   | T   |     |
| 5' | TGG | GAA | AAA | ATC | TGT | AAT | GCT | CTG | CTG | AAG | GCA | TAT | CAA | GCT | GAA | ATT | ATC | CAA | GCA | CGC | CAA | ATT | 924 |
| 1  | W   | E   | K   | I   | C   | N   | A   | L   | L   | K   | A   | Y   | Q   | A   | E   | I   | I   | Q   | A   | R   | Q   | I   |     |
| 5' | CTG | CAG | CAC | ATC | CTG | TTC | GGC | AAC | CTG | ATT | GAC | TTC | TGA |     |     |     |     |     |     |     |     |     |     |
| 1  | L   | Q   | H   | I   | L   | F   | G   | N   | L   | I   | D   | F   | .   |     |     |     |     |     |     |     |     |     |     |

Figure S4. Binding of inactive mutated PfPTPA with XePP2A in oocytes. Co-immunoprecipitation experiment of the PfPTPA-XePP2A complexes was performed with anti-His antibodies (recognizing recombinant wild type and mutated PfPTPA) from microinjected Xenopus oocytes. Immunoprecipitates from Xenopus oocytes microinjected with water, WT or inactive mutated PfPTPA were eluted and separated by SDS-PAGE and transferred to nitrocellulose membrane. Immunoblot analysis was performed with anti-His or anti-PP2A (Abcam) antibodies.

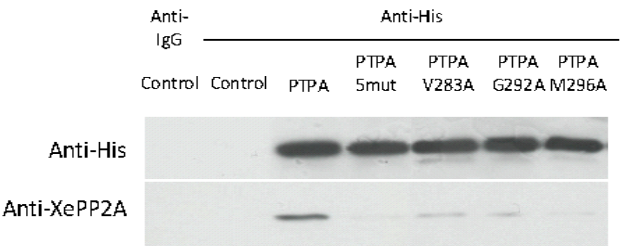

Supplement: s1 [file s1]
